# Supplementary material for: Seroprevalence of Scrub Typhus, Typhus, and Spotted Fever Among Rural and Urban Populations of Northern Vietnam
Source: PubMed Central journal article supplement (PMC5417199; doi:10.4269/ajtmh.16-0399), 2017-05-03
Supplement: SD2.pdf [file SD2.pdf]

SUPPLEMENTAL TABLE 1  
Seroprevalence data reported from various studies that used ELISAs or indirect IPP assays similar to the current study

| Country                          | % STG positive |         | % TG positive |         | % SFG positive                                                                 |       | Cutoff                                                             | Notes                      | Reference |
|----------------------------------|----------------|---------|---------------|---------|--------------------------------------------------------------------------------|-------|--------------------------------------------------------------------|----------------------------|-----------|
|                                  | (IgM)          | (IgG)   | (IgM)         | (IgG)   | (IgM)                                                                          | (IgG) |                                                                    |                            |           |
| Bangladesh                       | 66             | 23      | ND            | ND      | Single dilution, 1:100; net OD $\geq$ 1.0                                      |       | Residual sera collections from hospitals; all ages; no exclusions  | Maude and others, 2014     |           |
| Kenya                            | 5              | < 1     | 10            | 10      | Screening at 1:100 followed by titrations to confirm; cumulative OD $\geq$ 1.0 |       | N = 2,225; febrile patients, all ages, mean 5 years                | Thiga and others, 2014     |           |
| Lao People's Democratic Republic | 20.3           | 20.6    | ND            | ND      | For STG, used a commercial PanBio kit; for TG, used similar antigens as Thiga  |       | N = 2,002; healthy adults $\geq$ 35 years                          | Vallee and others, 2010    |           |
| Indonesia                        | 1.3            | 34.7    | ND            | ND      | Titration from 1:100 to 1:6,400; highest titer with net OD $\geq$ 0.2          |       | N = 464 healthy individuals, all ages; mean 34 years               | Richards and others, 1997  |           |
| Thailand*                        | 21 (IgM)       | 8 (IgM) | 4 (IgM)       | 4 (IgM) | Screening at 1:50, followed by endpoint titrations                             |       | N = 215 healthy individuals, all ages                              | Strickman and others, 1994 |           |
| Malaysia*                        | 8.8            | 1.7     | 3.7           | 3.7     | Titrations 1 x to 1:1,600; reactivity at 1:100 reported here                   |       | N = 295 febrile inpatients, all ages                               | Tay and others, 2003       |           |
| Thailand                         | ND             | ND      | 30            | 30      | Single dilution, 1:100; "index calibrator" $\geq$ 1.2                          |       | N = 375 febrile patients; $\geq$ 15 years age                      | Blacksell and others, 2015 |           |
| United States                    | ND             | ND      | 6             | 6       | Same as Thiga (except no screening, all samples were titrated)                 |       | N = 10,000; military personnel, all deployments; mean age 28 years | Graf and others, 2014      |           |
| Vietnam                          | 1.1            | 6.5     | 1.7           | 1.7     | Same as Thiga                                                                  |       |                                                                    | Our study                  |           |

ELISA = enzyme-linked immunosorbent assay; IPP = immunoperoxidase; OD = optical density; ND = not done; SFG = spotted fever group rickettsiae; STG = scrub typhus group orientiae; TGR = typhus group rickettsiae. Unless otherwise indicated, the reported serologies refer to IgG analyses.  
\*Testing performed by indirect IPP assay.
